# Supplementary material for: Peptides and protein hydrolysates exhibiting anti-inflammatory activity: sources, structural features and modulation mechanisms
Source: Royal Society of Chemistry journal article supplement (doi:10.1039/d2fo02223k), 2022-01-01
Supplement: d2fo02223k1.xlsx [file d2fo02223k1.xlsx]

## Sheet: Peptides bioactivity (in vitro)
	Table S1. Bioactivity values for anti-inflammatory peptides reported in literature (in vitro)
	Protein type	Protein type subdivision	Protein source	Peptide obtention	Sequence	Regulatory mechanism	Cell type	Inducing agent	Peptide (µg/mL)	NO production	NO inhibition	Nitrite	iNOS inhibition	TNF-α	IL-1β	IL-6	IL-10	PGE2	IL-8	VCAM-1	IFN-γ	COX-2 inhibition	5-LOX inhibition	Link
	Animal	Egg and dairy	Egg	Enzymatic hydrolysis simulated in silico (Pepsin and trypsin)	HC	Reduce IL-8 secretion, TNF-α, IL-8, IL-6 and IL-1β expressions, phosphorylation of pJNK and p-p-38 and increased IL-10 expression	Caco-2	TNF-α (2 ng/mL)	8265.6										<30 pg/mL					https://doi.org/10.1016/j.jff.2017.07.064
	Animal	Egg and dairy	Egg	Enzymatic hydrolysis simulated in silico (Pepsin and trypsin)	FL	Reduce IL-8 secretion, TNF-α, IL-8, IL-6 and IL-1β expressions and increased IL-10 expression	Caco-2	TNF-α (2 ng/mL)	8907.2										<3000 pg/mL					https://doi.org/10.1016/j.jff.2017.07.064
	Animal	Egg and dairy	Egg	Enzymatic hydrolysis simulated in silico (Pepsin and trypsin)	MK	Reduce IL-8 secretion, TNF-α, IL-8, IL-6 and IL-1β expressions and increased IL-10 expression	Caco-2	TNF-α (2 ng/mL)	8876.5										<3500 pg/mL					https://doi.org/10.1016/j.jff.2017.07.064
	Animal	Egg and dairy	Egg	Enzymatic hydrolysis simulated in silico (Pepsin and trypsin)	LL	Reduce IL-8 secretion, TNF-α, IL-8, IL-6 and IL-1β expressions and increased IL-10 expression	Caco-2	TNF-α (2 ng/mL)	7818.56										<4000 pg/mL					https://doi.org/10.1016/j.jff.2017.07.064
	Animal	Egg and dairy	Egg	Enzymatic hydrolysis simulated in silico (Pepsin and trypsin)	CR	Reduce IL-8 secretion, TNF-α, IL-8, IL-6 and IL-1β expressions, phosphorylation of pJNK and p-p-38 and increased IL-10 expression	Caco-2	TNF-α (2 ng/mL)	8875.2										<50 pg/mL					https://doi.org/10.1016/j.jff.2017.07.064
	Animal	Egg and dairy	Egg	Enzymatic hydrolysis (Pepsin and pancreatin)	MLGATSL (ML-7)	Inhibit expressions of TNF-α, IL-8, IL-6, IL-1β, IL-12, JNK, IκB, and p38 and increase IL-10 expression	Caco-2	TNF-α (2 ng/mL)	250										−34.6%					https://doi.org/10.1016/j.jnutbio.2018.09.019
	Animal	Egg and dairy	Egg	Enzymatic hydrolysis (Pepsin and pancreatin)	DEDTQAMPFR (DR-10)	Inhibit expressions of TNF-α, IL-8, IL-6, IL-1β, IL-12, JNK, IκB, and p38 and increase IL-10 expression	Caco-2	TNF-α (2 ng/mL)	250										−35.2%					https://doi.org/10.1016/j.jnutbio.2018.09.019
	Animal	Egg and dairy	Egg	Enzymatic hydrolysis (Pepsin and pancreatin)	DEDTQAMPF (DF-9)	Inhibit expressions of TNF-α, IL-8, IL-6, IL-1β, IL-12, JNK, IκB, and p38 and increase IL-10 expression	Caco-2	TNF-α (2 ng/mL)	250										−35.9%					https://doi.org/10.1016/j.jnutbio.2018.09.019
	Animal	Egg and dairy	Milk (α-LA)	Enzymatic hydrolysis (Alcalase)	DQWL	Inhibited gene expression of IL-1β, COX-2, and TNF-α	RAW 264.7	LPS (10 ng/mL)	10					<50000 pg/mL	<700 pg/mL (−49.5%)							0.621		http://dx.doi.org/10.3168/jds.2016-11186
	Animal	Egg and dairy	Milk (β-casein)	Enzymatic hydrolysis (Trypsin)	KVLPVPQK (K-8-K)	Reduced levels of NF-κB in the nucleus and TNF-α, IL-6, and IL-1β gene expression	Caco-2	LPS (10 µg/mL)	50					140 pg/mL										https://doi.org/10.3390/ijms23084382
	Animal	Egg and dairy	Egg	Enzymatic hydrolysis (Pepsin and pancreatin)	GW	Reduced the expression of TNF-α, ICAM-1 and VCAM1	HUVECs	TNF-α (5 ng/ml)	13.06											−64.3%				https://doi.org/10.1021/acs.jafc.5b04230
	Animal	Marine	Sea cucumber, Actinopyga lecanora	Enzymatic hydrolysis (Bromelain)	LREMLSTMCTARGA	Inhibited NO production	RAW 264.7	LPS (10 µg/mL)	3079700	0.237	0.763													https://doi.org/10.1080/08905436.2016.1234391
	Animal	Marine	Sea cucumber, Actinopyga lecanora	Enzymatic hydrolysis (Bromelain)	VAPAWGPWPKG	Inhibited NO production	RAW 264.7	LPS (10 µg/mL)	2330680	0.301	0.699													https://doi.org/10.1080/08905436.2016.1234391
	Animal	Marine	Sea cucumber, Actinopyga lecanora	Enzymatic hydrolysis (Bromelain)	AVGPAGPRG	Inhibited NO production	RAW 264.7	LPS (10 µg/mL)	1561740	0.334	0.666													https://doi.org/10.1080/08905436.2016.1234391
	Animal	Marine	Salmon pectoral fin, Salmo salar	Enzymatic hydrolysis (Pepsin)	PAY	Inhibited NO, PGE2, IL-6, TNF-α and IL-1β production	RAW 264.7	LPS (1000 ng/mL)	26000	0.362	0.638	6 μM		>150 pg/mL	>40 pg/mL	180 pg/mL		230 pg/mL						https://doi.org/10.1016/j.foodchem.2014.05.112
	Animal	Marine	Bivalve visceral mass, Meretrix meretrix	Enzymatic hydrolysis (Trypsin)	GQCC (MMV2)	Reduced iNOS activity, inhibited production of TNF-α and IL-1β, and prevented activation of COX-2	RAW 264.7	LPS (1000 g/mL)	250	0.42	0.58			100 pg/mL	41 pg/mL							16-17 pg/mL		https://doi.org/10.1016/j.intimp.2020.107140
	Animal	Marine	Oyster, Ostreidae	Enzymatic hydrolysis (Protamex, Neutrase, Pepsin, trypsin, α-chymotrypsin, carboxypeptidase A)	YA	Inhibited NO production	RAW 264.7	LPS (1000 ng/mL)	0.6307	0.474	0.526													https://doi.org/10.1155/2018/8437379
	Animal	Marine	Mollusk, Abalone Haliotis discus hannai	Enzymatic hydrolysis (Pepsin, trypsin, α-chymotrypsin)	PFNEGTFAS	Inhibited NO production, reduced gene transcription levels of IL-1β, IL-6, and TNF-α, and suppressed phosphorylation of p-p38 and p-JNK MAPKs	RAW 264.7	LPS (100 ng/mL)	54.07	0.5	0.5													doi: 10.12691/jfnr-4-10-9
	Animal	Marine	Peanut worm, Sipunculus nudus Linn.	Enzymatic hydrolysis (Alcalase)	TVNLAYY	inhibited NO production and reduced gene expression of iNOS, IL-6, TNF-α, and COX-2	RAW 264.7	LPS (100 ng/mL)	572096	0.5	0.5													https://doi.org/10.1039/c9fo02178g
	Animal	Marine	Peanut worm, Sipunculus nudus Linn.	Enzymatic hydrolysis (Alcalase)	LSPLLAAH	inhibited NO production and reduced gene expression of iNOS, IL-6, TNF-α, and COX-2	RAW 264.7	LPS (100 ng/mL)	674435	0.5	0.5													https://doi.org/10.1039/c9fo02178g
	Animal	Marine	Salmon bones, Salmo salar	Enzymatic hydrolysis (Papain)	SNKGGGRPN	Inhibited NO production and iNOS, IL-6, TNF-α and COX-2 mRNA levels	RAW 264.7	LPS (100 ng/mL)	2.56 µg/mL	0.5	0.5													https://doi.org/10.1002/jsfa.9755
	Animal	Marine	Salmon bones, Salmo salar	Enzymatic hydrolysis (Papain)	TVTVYSLLR	Inhibited NO production and iNOS, IL-6, TNF-α and COX-2 mRNA levels	RAW 264.7	LPS (100 ng/mL)	2.56 µg/mL	0.5	0.5													https://doi.org/10.1002/jsfa.9755
	Animal	Marine	Salmon bones, Salmo salar	Enzymatic hydrolysis (Papain)	PGVATAPTH	Inhibited NO production and iNOS, IL-6, TNF-α and COX-2 mRNA levels	RAW 264.7	LPS (100 ng/mL)	2.89 µg/mL	0.5	0.5													https://doi.org/10.1002/jsfa.9755
	Animal	Marine	Salmon bones, Salmo salar	Enzymatic hydrolysis (Papain)	SLPEANSLRHR	Inhibited NO production and iNOS, IL-6, TNF-α and COX-2 mRNA levels	RAW 264.7	LPS (100 ng/mL)	2.89 µg/mL	0.5	0.5													https://doi.org/10.1002/jsfa.9755
	Animal	Marine	Salmon bones, Salmo salar	Enzymatic hydrolysis (Papain)	LLGLGLPPA	Inhibited NO production and iNOS, IL-6, TNF-α and COX-2 mRNA levels	RAW 264.7	LPS (100 ng/mL)	4.58 µg/mL	0.5	0.5													https://doi.org/10.1002/jsfa.9755
	Animal	Marine	Salmon bones, Salmo salar	Enzymatic hydrolysis (Papain)	TLGTGLCPV	Inhibited NO production and iNOS, IL-6, TNF-α and COX-2 mRNA levels	RAW 264.7	LPS (100 ng/mL)	4.58 µg/mL	0.5	0.5													https://doi.org/10.1002/jsfa.9755
	Animal	Marine	Salmon bones, Salmo salar	Enzymatic hydrolysis (Papain)	LKPKGGSVP	Inhibited NO production and iNOS, IL-6, TNF-α and COX-2 mRNA levels	RAW 264.7	LPS (100 ng/mL)	4.58 µg/mL	0.5	0.5													https://doi.org/10.1002/jsfa.9755
	Animal	Marine	Salmon bones, Salmo salar	Enzymatic hydrolysis (Papain)	FGLLVNPGA	Inhibited NO production and iNOS, IL-6, TNF-α and COX-2 mRNA levels	RAW 264.7	LPS (100 ng/mL)	4.58 µg/mL	0.5	0.5													https://doi.org/10.1002/jsfa.9755
	Animal	Marine	Salmon bones, Salmo salar	Enzymatic hydrolysis (Papain)	NGRACSYKLWD	Inhibited NO production and iNOS, IL-6, TNF-α and COX-2 mRNA levels	RAW 264.7	LPS (100 ng/mL)	4.58 µg/mL	0.5	0.5													https://doi.org/10.1002/jsfa.9755
	Animal	Marine	Bivalve visceral mass, Meretrix meretrix	Enzymatic hydrolysis (Trypsin)	HKGQCC	Reduced iNOS activity, inhibited production of TNF-α and IL-1β, and prevented activation of COX-2	RAW 264.7	LPS (1000 ng/mL)	250	0.55	0.45			100 pg/mL	75 pg/mL							25 pg/mL		https://doi.org/10.1016/j.intimp.2020.107140
	Animal	Marine	Baijiao sea bass, Lateolabrax maculatus	Chemical extraction	DAPAPPSQLEHIRAA	Inhibited NO production	RAW 264.7	LPS (1000 ng/mL)	200	0.8	0.2													https://doi.org/10.1016/j.lwt.2021.111521
	Animal	Marine	Baijiao sea bass, Lateolabrax maculatus	Chemical extraction	AADGPMKGILGY	Inhibited NO production	RAW 264.7	LPS (1000 ng/mL)	200	0.8	0.2													https://doi.org/10.1016/j.lwt.2021.111521
	Animal	Marine	Salmon skin, Salmo salar	Enzymatic hydrolysis (Flavourzyme)	QA	Reduced NO, IL- 6, IL- 1β, and TNF- α secretion	RAW 264.7	LPS (1000 ng/mL)	217.22			<4 μM		1000 pg/mL	50 pg/mL	900 pg/mL								https://doi.org/10.1111/jfbc.14122
	Animal	Marine	Sea anemone, Heteractis crispa	Chemical extraction	RGICSEPKVVGPCKAGLRRFYYDSETGECKPFIYGGCKGNKNNFETLHACRGICRA (HCRG1)	Reduced TNF-α and IL-6 secretion and IL-1β precursor (proIL-1β) expression levels	J774A.1 cocultured with RAW 264.7	LPS (1000 ng/mL)	62.02					<80000 pg/mL		70000 pg/mL								https://doi.org/10.3390/md13106038
	Animal	Marine	Sturgeon muscle, Acipenseridae	Enzymatic hydrolysis (Pepsin)	KIWHHTF	Reduced NO, IL-6, and IL-1β production and inhibited phosphorylation of MAPKs	RAW 264.7	LPS (2000 ng/mL)	24.2			12 μM		750 pg/mL	45 pg/mL	240 pg/mL								https://doi.org/10.1016/j.jff.2020.104044
	Animal	Marine	Sturgeon muscle, Acipenseridae	Enzymatic hydrolysis (Pepsin)	VHYAGTVDY	Reduced NO, IL-6, and IL-1β production and inhibited phosphorylation of MAPKs	RAW 264.7	LPS (2000 ng/mL)	25.6			13 μM		>750 pg/mL	<50 pg/mL	220 pg/mL								https://doi.org/10.1016/j.jff.2020.104044
	Animal	Marine	Salmon skin, Salmo salar	Enzymatic hydrolysis (Flavourzyme)	APD	Reduced NO, IL- 6, IL- 1β, and TNF- α secretion	RAW 264.7	LPS (1000 ng/mL)	301.3			6-7 μM		1300 pg/mL	70 pg/mL	1400 pg/mL								https://doi.org/10.1111/jfbc.14122
	Animal	Marine	Salmon skin, Salmo salar	Enzymatic hydrolysis (Flavourzyme)	KA	Reduced NO, IL- 6, IL- 1β, and TNF- α secretion	RAW 264.7	LPS (1000 ng/mL)	217.27			6 μM		>1000 pg/mL	>60 pg/mL	1000 pg/mL								https://doi.org/10.1111/jfbc.14122
	Animal	Marine	Sturgeon muscle, Acipenseridae	Enzymatic hydrolysis (Pepsin)	HLDDALRGQE	Reduced NO, IL-6, and IL-1β production and inhibited phosphorylation levels of MAPKs	RAW 264.7	LPS (2000 ng/mL)	28.83			14 μM		<750 pg/mL	60 pg/mL	>190 pg/mL								https://doi.org/10.1016/j.jff.2020.104044
	Animal	Marine	Salmon skin hydrolysates, Salmo salar	Enzymatic hydrolysis (Flavourzyme)	WG	Reduced secretion of NO, IL- 6, IL- 1β, and TNF- α	RAW 264.7	LPS (1000 ng/mL)	261.28			<6 μM		1300 pg/mL	>60 pg/mL	>1000 pg/mL								https://doi.org/10.1111/jfbc.14122
	Animal	Marine	Sea anemone, Heteractis crispa	Chemical extraction	RGICLEPKVVGPCKARIRRFYYDSETGKCTPFIYGGCGGNGNNFETLHACRGICRA (HCRG2)	Reduced TNF-α and IL-6 secretion and IL-1β precursor (proIL-1β) expression levels	J774A.1 cocultured with RAW 264.7	LPS (1000 ng/mL)	61.57					<80000 pg/mL		<10000 pg/mL								https://doi.org/10.3390/md13106038
	Animal	Marine	Herring milt, Clupea harengus	Enzymatic hydrolysis (Alcalase)	FDKPVSPLL	Inhibited iNOS pathway decreasing NO production	RAW 264.7	LPS (2.5 ng/ml)	0.0001				0.1322											https://doi.org/10.1016/j.seppur.2019.116205
	Animal	Marine	Herring milt, Clupea harengus	Enzymatic hydrolysis (Alcalase)	IVPAS	Inhibited iNOS pathway decreasing NO production	RAW 264.7	LPS (2.5 ng/ml)	0.0001				0.1165											https://doi.org/10.1016/j.seppur.2019.116205
	Animal	Terrestrial	Chicken Cathelicidin-2, Gallus gallus domesticus	Chemical synthesis	FRASGQITITVKPRFRRIKRLFRGFR (CATH-2 )	Inhibited IL-1β transcription and NO production	HD11	LPS (50–100 ng/mL)	64.16	0	≈100%				−9.2%									https://doi.org/10.1371/journal.pone.0147919
	Animal	Terrestrial	Red deer velvet antler protein, Cervus elaphus Linnaeus	Enzymatic hydrolysis (Pepsin and pancreatin)	IA	Inhibited the production of pro-inflammatory molecule NO	RAW 264.7	LPS (1000 µg/mL)	200	0.888	0.112	>17 μM												http://dx.doi.org/10.1016/j.jfda.2015.10.003
	Animal	Terrestrial	Red deer velvet antler protein, Cervus elaphus Linnaeus	Enzymatic hydrolysis (Pepsin and pancreatin)	LAN	Inhibited the production of pro-inflammatory molecule NO	RAW 264.7	LPS (1000 µg/mL)	200	0.87	0.13	17 μM												http://dx.doi.org/10.1016/j.jfda.2015.10.003
	Animal	Terrestrial	Red deer velvet antler protein, Cervus elaphus Linnaeus	Enzymatic hydrolysis (Pepsin and pancreatin)	VH	Inhibited the production of pro-inflammatory molecule NO	RAW 264.7	LPS (1000 µg/mL)	200	0.155	0.845	16 μM												http://dx.doi.org/10.1016/j.jfda.2015.10.003
	Animal	Terrestrial	Red deer velvet antler protein, Cervus elaphus Linnaeus	Enzymatic hydrolysis (Pepsin and pancreatin)	AL	Inhibited the production of pro-inflammatory molecule NO	RAW 264.7	LPS (1000 µg/mL)	200	0.16	0.84	<16 μM												http://dx.doi.org/10.1016/j.jfda.2015.10.003
	Animal	Terrestrial	European red frog skin, Rana temporaria	Chemical synthesis	FVQWFSKFLGRIL (Temporin-1TL)	Inhibited TNF-α and NO production, and TNF-α and iNOS mRNA expression	RAW 264.7	LPS (20 ng/ml)	4.1	0.83	0.17			2250 pg/mL										https://doi.org/10.1002/psc.2807
	Animal	Terrestrial	Chinese scorpion, Mesobuthus martensii	Chemical extraction	HYGH	Reduced NO, TNF-α, IL-6, and IL-1β production and inhibited IκBα degradation, p65 nuclear translocation, NF-κB activation and phosphorylation of ERK, JNK, and p38 MAPKs	RAW 264.7	LPS (1000 ng/mL)	10.25	0.232	0.768			−75.6%	−71.6%	−72.4%								https://doi.org/10.1039/c9ra01623f
	Animal	Terrestrial	Clam worms, Marphysa sanguinea	Chemical extraction	NCWPFQGVPLGFQAPP	Inhibited IL-1 β, TNF-α, NO, iNOS, and COX-2 gene expression	RAW 264.7	LPS (2000 ng/mL)	87.9	0.3	0.7			80000 pg/mL	70 pg/mL									https://doi.org/10.4014/jmb.2003.03050
	Animal	Terrestrial	Gastropod visceral mass, Harpa ventricosa	Enzymatic hydrolysis (Trypsin, alcalase and pepsin)	AKGTWK	Inhibited NO, TNF-α and IL-1β production	THP-1	LPS (1000 ng/mL)	150	0.384	0.616			<80 pg/mL	<70 pg/mL									https://doi.org/10.1007/s12010-016-2156-y
	Animal	Terrestrial	Dynastid Beetle, Allomyrina dichotoma	Chemical synthesis	AFWCLIRRTVAA (Allomyrinasin )	Reduced NO and PGE2 production and COX-2 expression	RAW 264.7	LPS (1000 ng/mL)	200	0.4	0.6		0		<60 pg/mL	<500 pg/mL		4000 pg/mL				0		https://doi.org/10.4014/jmb.1809.09031
	Animal	Terrestrial	Frog skin, Hylarana guentheri	Chemical synthesis	GLFSKKGGKGGKSWIKGVFKGIKGIGKEVGGDVIRTGIEIAACKIKGEC (Esculentin-1GN)	Inhibited NO production, NO, IL-1β, IL6, and TNF-α gene expression and enhanced IL-10 expression	RAW 264.7	LPS (100 ng/mL)	0.4005	0.797	0.203	<40 μM	0.735	<1500 pg/mL	< 100 pg/mL	<150 pg/mL								https://doi.org/10.1021/acs.jmedchem.8b01358
	Animal	Terrestrial	Chicken Feather Meal, Gallus gallus domesticus	Enzymatic hydrolysis (Flavourzyme)	SNPSVAGVR	Reduced gene transcription levels of iNOS, TNF-α, COX-2 and IL-6	RAW 264.7	LPS (100 ng/mL)	48900-120000	<20%	>80%					−96%						0.83		https://doi.org/10.17113/ftb.57.02.19.5964
	Animal	Terrestrial	Spider venom gland, Pardosa astrigera	Chemical synthesis	AMMAESRKDNCIPKHHECTSRPKDCCKQNLMQFKCSCMTIIDKNNKETERCKCDNSIFQKVAKTSVNIGKAVVTK (Lycotoxin-Pa4a)	Reduced NO production via downregulation of the iNOS gene and COX-2, TNF-α and IL-1β expression	RAW 264.7	LPS (1000 ng/mL)	1708	21-22 μM														http://dx.doi.org/10.3390/antibiotics9070422
	Animal	Terrestrial	Locusts, Schistocerca gregaria	Enzymatic hydrolysis (α-amylase, pepsin, pancreatin, and bilioA)	FDPFPK	Inhibited LOX and COX activity	Comercial assay	--	7400													0.5	0.5	https://doi.org/10.1111/ijfs.13848
	Animal	Terrestrial	Brazilian scorpion venom, Tityus obscurus	Chemical synthesis	KIASVLGGILSPILSFF (ToAP4)	Reduced TNF-α and IL-1β gene expression and protein levels	J774, BMDMs and BMDCs	LPS (500 ng/mL)	44.05					250 pg/mL	<500 pg/mL		<800 pg/mL							https://doi.org/10.1016/j.biopha.2019.109152
	Animal	Terrestrial	Brazilian scorpion venom, Tityus obscurus	Chemical synthesis	KIASILGGILGPIMGIF (ToAP3)	Reduced TNF-α and IL-1β gene expression and protein levels	J774, BMDMs and BMDCs	LPS (500 ng/mL)	42.5					250 pg/mL	<500 pg/mL		<800 pg/mL							https://doi.org/10.1016/j.biopha.2019.109152
	Animal	Terrestrial	Centipede, Scolopendra subspinipes mutilans	Chemical synthesis	KKASKSVIKIFYKCM (Scolopendrasin IX)	Inhibited TNF-α, IL-6, and inhanced IL-10 production	Mouse neutrophil	LPS (1000 ng/mL)	50					<200 pg/mL		<250 pg/mL	<1000 pg/mL							https://doi.org/10.1038/s41598-018-32963-5
	Animal	Terrestrial	Human, Homo sapiens	Chemical synthesis	SIFGKIFKRIIRVAWK (Hs02)	Inhibited TNF-α production	C57BL/6 cocultured with THP-1	LPS (500 ng/mL)	1.96					<10 pg/mL	4 pg/mL	8 pg/mL		40 pg/mL						https://doi.org/10.1371/journal.pone.0220656
	Animal	Terrestrial	Chicken sternal cartilage, Gallus gallus domesticus Type II collagen (CII)	Enzymatic hydrolysis (Papain)	VAIQAVLSLYASGR	Inhibited IL-1β, TNF-α, and PGE2 production	C518	LPS (100 ng/mL)	2000					128.97 pg/mL	42.46 pg/mL			40.79 pg/mL						https://doi.org/10.3390/molecules23123257
	Animal	Terrestrial	Hen spent muscle, Gallus gallus domesticus	Enzymatic hydrolysis (Protease M and Protex 50FP)	SFMNVKHWPW	Inhibited IL-6 production	U937	LPS (1000 ng/mL)	100							0.5								https://doi.org/10.1016/j.foodchem.2018.01.093
	Animal	Terrestrial	Hen spent muscle, Gallus gallus domesticus	Enzymatic hydrolysis (Protease M and Protex 50FP)	AFMNVKHWPW	Inhibited IL-6 production	U937	LPS (1000 ng/mL)	100							0.5								https://doi.org/10.1016/j.foodchem.2018.01.093
	Animal	Terrestrial	Black fly salivary glands, Simulium bannaense	Chemical extraction	GKLTKDKLKRGAKKALNVASKV (SibaCec)	Inhibited NO, TNF-α, IL-1β, and IL-6 transcription and production Inhibited MAPKs and NF-κB inflammatory signaling pathways	C57BL/6	LPS (100 ng/mL	20			6 μM	0.519	400 pg/mL	400 pg/mL	250 pg/mL								https://doi.org/10.1186/s13071-015-1176-8
	Animal	Terrestrial	Horsefly salivary glands, Tabanus yao	Chemical extraction	RGQANILAGKNIKIRSGAAAGVGKTPQKANVEVLALGIW (Cecropin-TY1)	Inhibited NO, IL-1β, IL6, and TNF-α production	C57BL/6	LPS (100 ng/mL	3.97			5 μM	0.588	250 pg/mL	300 pg/mL	150 pg/mL								https://doi.org/10.1186/s13071-015-1149-y
	Animal	Terrestrial	Spider venom glands, Agelena koreana	Chemical synthesis	FKGLAKLLKIGLKALAKVIQ (Ak-N’)	Reduced TNF-α, IL-6, and IL-1β gene expression	THP-1	LPS (1000 ng/mL)	4305					700 pg/mL	760 pg/mL	>100 pg/mL								https://doi.org/10.3389/fimmu.2022.821070
	Animal	Terrestrial	Snake venom gland, Hydrophis cyanocinctus	Chemical synthesis	DEQHLETELHTHLTSVLTANGFQ (Hydrostatin-SN1)	Inhibited TNF-α, IL-6, and IL-1β	RAW 264.7	LPS (1000 ng/mL)	26.21					500 pg/mL	<50 pg/mL	<50 pg/mL								https://doi.org/10.3389/fphar.2017.00246
	Animal	Terrestrial	Spider venom glands, Agelena koreana	Chemical synthesis	NKGLAKLLKIGLKALESVIQ (Ak-N’m )	Reduced TNF-α, IL-6, and IL-1β gene expression	THP-1	LPS (1000 ng/mL)	4273					600 pg/mL	700 pg/mL	<100 pg/mL								https://doi.org/10.3389/fimmu.2022.821070
	Animal	Terrestrial	Hard tick, Amblyomma variegatum	Chemical synthesis	HLHMHGNGATQVFKPRLVLKCPNAAQLIQPGKLQRQLLLQ (Amregulin)	Inhibited TNF-α, IL-8 and IFN-γ production	Rat splenocytes	LPS (2000 ng/mL)	8					<800 pg/mL							699 pg/mL			https://doi.org/10.3390/toxins8050133
	Animal	Terrestrial	Cecropia moth, Hyalophora cecropia	Chemical synthesis	KWKLFKKIEKVGQNIRDGIIKAGPAVAVVGQATQIAK (Cecropin A)	Reduced NO production, mTNF-α and mIL-1β cytokine release, and COX-2 expression	RAW 264.7	LPS (20 ng/ml)	20			0 μM		4000 mTNFα										https://doi.org/10.1002/arch.21193
	Plant	Gramineae	Rice, Oryza sativa L	Enzymatic hydrolysis (Trypsin)	IGVAMDYSASSKR	Inhibited gene expression of iNOS, IL-1β, IL-6, and TNFα	RAW 264.7	LPS (10000 g/mL)	12.5-25			>15000 μM		>400 pg/mL	700 pg/mL	6500 pg/mL								https://doi.org/10.1007/s11130-022-00963-6
	Plant	Gramineae	Rice, Oryza sativa L	Enzymatic hydrolysis (Trypsin)	DNIQGITKPAIR	Inhibited gene expression of iNOS, IL-1β, IL-6, and TNFα	RAW 264.7	LPS (10000 ng/mL)	12.5-25			10000-13000 μM		400 pg/mL	400 pg/mL	4000 pg/mL								https://doi.org/10.1007/s11130-022-00963-6
	Plant	Gramineae	Rice, Oryza sativa L	Enzymatic hydrolysis (Trypsin)	IAFKTNPNSMVSHIAGK	Inhibited gene expression of iNOS, IL-1β, IL-6, and TNFα	RAW 264.7	LPS (10000 ng/mL)	12.5-25			10000-13000 μM		500 pg/mL	>400 pg/mL	<5000 pg/mL								https://doi.org/10.1007/s11130-022-00963-6
	Plant	Gramineae	Rice, Oryza sativa L	Enzymatic hydrolysis (Trypsin)	QRDFLLAGNKRNPQAY	Inhibited nuclear translocation of p65, NO and TNF-α production and reduced TNF-α, iNOS, IL-6 and IL-1β transcription	RAW 264.7	LPS (1000 ng/mL)	250			<15 μM		<900 pg/mL										https://doi.org/10.1039/C6RA08927E
	Plant	Gramineae	Corn zein, Zea mays	Enzymatic hydrolysis (Alcalase, neutral protease, thermolysin, pepsin, pancreatin)	PPYLSP	Reduced gene expression of TNF-α and VCAM-1	EA.hy926	TNF-α (10 ng/mL)	134.55											−46%				https://doi.org/10.1021/acs.jafc.7b04562
	Plant	Gramineae	Corn zein, Zea mays	Enzymatic hydrolysis (Alcalase, neutral protease, thermolysin, pepsin, pancreatin)	IIGGAL	Reduced gene expression of TNF-α and VCAM-1	EA.hy926	TNF-α (10 ng/mL)	108.53											−52.2%				https://doi.org/10.1021/acs.jafc.7b04562
	Plant	Gramineae	Corn zein, Zea mays	Enzymatic hydrolysis (Alcalase, neutral protease, thermolysin, pepsin, pancreatin)	FLPPVTSMG	Reduced gene expression of TNF-α and VCAM-1	EA.hy926	TNF-α (10 ng/mL)	189.63											−61.1%				https://doi.org/10.1021/acs.jafc.7b04562
	Plant	Leguminosae	Fermented sorghum (Baijiu vinasse), Sorghum bicolor	Enzymatic hydrolysis (Corolase PP)	VDVPVKVPYS (VPH-2 )	Inhibited NO, TNF-α, IL-6 and IL-1β production	RAW 264.7	LPS (100 ng/mL)	250	0.11	0.89					−78%								https://doi.org/10.1016/j.foodchem.2020.128159
	Plant	Leguminosae	Fermented sorghum, Baijiu vinasse	Enzymatic hydrolysis (Corolase PP)	KLPDHPKLPK (VPH-1)	Inhibited NO, TNF-α, IL-6 and IL-1β production	RAW 264.7	LPS (100 ng/mL)	250	0.16	0.84	<5 μM		<100 pg/mL	<100 pg/mL	−71%								https://doi.org/10.1016/j.foodchem.2020.128159
	Plant	Leguminosae	Black soybean, Glicine max	?¿ Extraction high hydrostatic pressure (HHP)	RGD	Inhibited NO, NF-α, IL-1β, and IL-6 production	RAW 264.7	LPS (500 ng/mL)	25	11.95 μM				−61.27%	−54.62%	−55.41%								https://doi.org/10.1016/j.phytol.2018.07.008
	Plant	Leguminosae	Soybean, Glycine max	Enzymatic hydrolysis (Alcalase and neutrase)	YGGGGE	Reduced NO production and gene expression, TNF-α, IL-1β and IL-6 production and promote IL-10 gene expression	IEC-6	LPS (100 µg/mL)	100-600	24.24-43.22%	56.78-75.76%	<2 μM		<25 pg/mL	<150 pg/mL	10 pg/mL								https://doi.org/10.1016/j.foodchem.2022.132868
	Plant	Leguminosae	Soybean, Glycine max	Enzymatic hydrolysis (Alcalase and neutrase)	SEGGFLE	Reduced NO production and gene expression, TNF-α, IL-1β and IL-6 production and promote IL-10 gene expression	IEC-6	LPS (100 µg/mL)	100-600	24.24-43.22%	56.78-75.76%	<2 μM		<25 pg/mL	<150 pg/mL	10 pg/mL								https://doi.org/10.1016/j.foodchem.2022.132868
	Plant	Leguminosae	Soybean, Glicine max	Enzymatic hydrolysis (Trypsin)	SLVNNDDRDS (S-10-S)	Reduced levels of NF-κB in the nucleus and TNF-α, IL-6, and IL-1β gene expression	Caco-2	TNF-α (2 ng/mL) LPS (10 µg/mL)	50					140 pg/mL	−20%									https://doi.org/10.3390/ijms23084382
	Plant	Leguminosae	Lupinus angustifolius L. seeds	Enzymatic hydrolysis (Alcalase)	GPETAFLR	Reduced IL-1β, IL-6, and TNF-α production and increased IL-10 production and gene expression	THP-1	LPS (100 ng/mL) IFNγ (20 ng/mL) IL-4 (20ng/mL)	100					<750 pg/mL	<100 pg/mL	<300 pg/mL	<400 pg/mL							http://dx.doi.org/10.1039/C9FO00115H
	Plant	Leguminosae	Lupin, Lupinus angustifolius L.	Enzymatic hydrolysis (Pepsin and pancreatin)	IQDKEGIPPDQQR (IQD)	Inhibited TNF-α, IL-6, IL-1β porduction	RAW 264.7	LPS (1000 ng/mL)	15.23					<4000 pg/mL	150 pg/mL	150 pg/mL								https://doi.org/10.1021/acs.jafc.0c02476
	Plant	Leguminosae	Foxtail Millet, Setaria italica	Enzymatic hydrolysis (Ppepsin and pancreatin)	QNWDFCEAWEPCF	Inhibited NO, IL-6, and TNF-α production	RAW 264.7	LPS (1000 ng/mL)	25			1.4 μM		4 pg/mL		12 pg/mL								https://doi.org/10.1021/acs.jafc.0c03732
	Plant	Leguminosae	Foxtail Millet, Setaria italica	Enzymatic hydrolysis (Ppepsin and pancreatin)	EDDQMDPMAK	Inhibited NO, IL-6, and TNF-α production	RAW 264.7	LPS (1000 ng/mL)	25			0.53 μM		4 pg/mL		12 pg/mL								https://doi.org/10.1021/acs.jafc.0c03732
	Plant	Leguminosae	Soybean, Glycine max	Chemical synthesis	FLV	Inhibited the release of inflammatory cytokines (TNFa, MCP-1, and IL-6)	RAW 264.7 cocultured with 3T3-L1	TNF-α (10 ng/mL)	0.37748					<200 pg/mL		<50 pg/mL								https://doi.org/10.1089/jmf.2016.3685
	Plant	Leguminosae	Lupin seeds, Lupinus angustifolius L.	Enzymatic hydrolysis (Alcalase)	GPETAFLR	Reduced IL-1β, IL-6, and TNF-α production and increased IL-10 production and gene expression	ARPE‐19	LPS (100 ng/mL)	100					<50 pg/mL	3 pg/mL	<40 pg/mL					<40 pg/mL			https://doi.org/10.1111/jfbc.12995
	Plant	Other plant sources	Hempseed, Cannabis sativa	Enzymatic hydrolysis (Pepsin)	WVSPLAGRT	Reduced NO production levels and modulate IFN-γ, TNF-α, IL-6 and IL-10 levels	HepG2	LPS (1000 ng/mL)	98.61	0.91	0.09		0.344	−17.6%			mas9.6%				−33.0%			https://doi.org/10.1021/acs.jafc.1c07520
	Plant	Other plant sources	Hempseed, Cannabis sativa	Enzymatic hydrolysis (Pepsin)	IGFLIIWV	Reduced NO production levels and modulate IFN-γ, TNF-α, IL-6 and IL-10 levels	HepG2	LPS (1000 ng/mL)	24005	0.928	0.072		0.253	−20.3%		−15.1%	mas26.0%				−13.1%			https://doi.org/10.1021/acs.jafc.1c07520
	Plant	Other plant sources	Walnut, Juglans regia	Enzymatic hydrolysis (Viscozyme L and pancreatin)	GVYY	Inhibited gene expression of COX2 and iNOS, and production of NO and PGE2	BV-2	LPS (100 ng/mL)	50.05			53.37 μM		1300.18 pg/mL	<400 pg/mL	200 pg/mL		107.83 pg/mL						https://doi.org/10.1021/acs.jafc.9b07670
	Plant	Other plant sources	Walnut, Juglans regia	Enzymatic hydrolysis (Viscozyme L and pancreatin)	APTLW	Inhibited gene expression of COX2 and iNOS, and production of NO and PGE2	BV-2	LPS (100 ng/mL)	58.67			55.77 μM		900.93 pg/mL	400 pg/mL	500 pg/mL		114.68 pg/mL						https://doi.org/10.1021/acs.jafc.9b07670
	Plant	Other plant sources	Walnut, Juglans regia	Enzymatic hydrolysis (Viscozyme L and pancreatin)	LPF	Inhibited gene expression of COX2 and iNOS, and production of NO and PGE2	BV-2	LPS (100 ng/mL)	37.55			48.74 μM		2200.41 pg/mL	490 pg/mL	300 pg/mL		125.82 pg/mL						https://doi.org/10.1021/acs.jafc.9b07670
	Plant	Other plant sources	Lychee seeds, Litchi chinensis Sonn.	Enzymatic hydrolysis (Alcalase, Flavourzyme, Neutrase)	KVRTKLLPP	Inhibited NO production by down-regulation of iNOS and IL-6	RAW 264.7	LPS (2500 ng/mL)	50000	10.9 µg/mL														https://doi.org/10.1080/08905436.2018.1443821
	Plant	Other plant sources	Lychee seeds, Litchi chinensis Sonn.	Enzymatic hydrolysis (Alcalase, Flavourzyme, Neutrase)	RPLVTHK	Inhibited NO production by down-regulation of iNOS and IL-6	RAW 264.7	LPS (2500 ng/mL)	50000	4.42 µg/mL														https://doi.org/10.1080/08905436.2018.1443821
	Plant	Other plant sources	Lychee seeds, Litchi chinensis Sonn.	Enzymatic hydrolysis (Alcalase, Flavourzyme, Neutrase)	MKLCWQKSIHGS	Inhibited NO production by down-regulation of iNOS and IL-6	RAW 264.7	LPS (2500 ng/mL)	50000	5.35 µg/mL														https://doi.org/10.1080/08905436.2018.1443821
	Synthetic		AMP (Chemokine CXCL14)	Chemical synthesis	YKRWKKNWAKYWKIFRK (CXCL14-C17-a2)	Inhibited NO, TNF-α and IL-6 production	RAW 264.7	LPS (20 ng/ml)	97.19	0	≈100%			<400 pg/mL		<50 pg/mL								https://doi.org/10.1016/j.bbamem.2018.06.016
	Synthetic		AMP (Chemokine CXCL14)	Chemical synthesis	YKRWKKRWAKYWKKFRK (CXCL14-C17-a3)	Inhibited NO, TNF-α and IL-6 production	RAW 264.7	LPS (20 ng/ml)	99.48	0	≈100%			100 pg/mL		<50 pg/mL								https://doi.org/10.1016/j.bbamem.2018.06.016
	Synthetic		AMP (Temporin-1TL)	Chemical synthesis	FVRWWSKWLRRIL (TL-2)	Inhibited TNF-α and NO production, and TNF-α and iNOS mRNA expression	RAW 264.7	LPS (20 ng/ml)	4.61	0.12	0.88			1500 pg/mL										https://doi.org/10.1002/psc.2807
	Synthetic		AMP (Chicken Cathelicidin-2)	Chemical synthesis	QITITVKPRFRRIKRLFRGFR	Inhibited IL-1β transcription and NO production	HD11	LPS (50 ng/mL)	53.78	0.121	0.875				−6.5%									https://doi.org/10.1371/journal.pone.0147919
	Synthetic		De novo designed	Chemical synthesis	KKIRVRLSA (SET-M33D)	Reduced TNF-α, IL6, COX-2, iNOS and NF-κB gene expression	RAW 264.7	LPS (20-1000 ng/mL)	21.41	0.13	0.87											0.784		http://dx.doi.org/10.3390/antibiotics9120840
	Synthetic		AMP (Temporin-1TL)	Chemical synthesis	FVKWWSKWLKKIL (TL-4)	Inhibited TNF-α and NO production, and TNF-α and iNOS mRNA expression	RAW 264.7	LPS (20 ng/ml)	4.41	0.17	0.83			<1300 pg/mL										https://doi.org/10.1002/psc.2807
	Synthetic		AMP (Temporin-1TL)	Chemical synthesis	FVRWWSRWLRRIL (TL-3)	Inhibited TNF-α and NO production, and TNF-α and iNOS mRNA expression	RAW 264.7	LPS (20 ng/ml)	4.69	0.181	0.819			<1400 pg/mL										https://doi.org/10.1002/psc.2807
	Synthetic		AMP (Tick defensin OsDef1)	Chemical synthesis	KGIRGYKGGYCKGAFKQTCKCY (Os)	Inhibited LPS/IFN-γinduced NO and TNF-α production	RAW 264.7	LPS/IFN-γ (100 ng/mL)	61.49	0.75	0.25			0.2 pg/mL										https://doi.org/10.1002/psc.2838
	Synthetic		AMP (Tick defensin OsDef1)	Chemical synthesis	KGIRGYKGGYKGAFKQTKY (Os-C)	Inhibited LPS/IFN-γinduced NO and TNF-α production	RAW 264.7	LPS/IFN-γ (100 ng/mL)	53.76	0.64	0.36			0.35 pg/mL										https://doi.org/10.1002/psc.2838
	Synthetic		AMP (Temporin-1TL)	Chemical synthesis	FVQWWSKWLGRIL (TL-1)	Inhibited TNF-α and NO production, and TNF-α and iNOS mRNA expression	RAW 264.7	LPS (20 ng/ml)	4.3	0.579	0.421			>1600 pg/mL										https://doi.org/10.1002/psc.2807
	Synthetic		AMP (Chicken Cathelicidin-2)	Chemical synthesis	QITITVKPRFRRIKRLFR	Inhibited IL-1β transcription and NO production	HD11	LPS (50–100 ng/mL)	46.58	0.5	0.5				−80.5%									https://doi.org/10.1371/journal.pone.0147919
	Synthetic		Hormone (Glucagon-like peptide-1)	Chemical synthesis	HAEGTFTSDVSSYLEGQAAKEFI (Liraglutide)	Reduced NO, PGE2, and IL-6 production, IL-6, COX-2, and TNF-α gene expression	RAW 264.7	IL-1β (2 ng/mL) LPS 100 (ng/mL)	0.09453	0.5	0.5													https://doi.org/10.1038/s41598-022-05323-7
	Synthetic		De novo designed	Chemical synthesis	KKIRVRLSA (SET-M33D)	Inhibited TNF-α, IL-6, and IL-1β, IL8 and others pro-inflammatory cytokines production, COX-2, iNOS and NF-kB activation	RAW 264.7	LPS (20-100 ng/mL)	1.07-10.7				78.4-83.3%	−58.3-95.7%	−37.5-77.6%	130.8 pg/mL			114.8 pg/mL			55.6-84%		https://doi.org/10.1074/jbc.M116.750257
	Synthetic		De novo designed	Chemical synthesis	GAKYAKIIYNYLKKIANALW (GW-A2)	Reduced NO, iNOS, COX-2, TNF-α and IL-6 expression levels, phosphorylation of MAPK and NF-κB activation	RAW 264.7	LPS (100 ng/mL)	9.36				0.6	400-4000 pg/mL		0-0.3 pg/mL						30-40%		https://doi.org/10.1371/journal.pone.0182057
	Synthetic		AMP (Chensinin-1)	Chemical synthesis	SAVWRHWRRFWLRKHRKH (MC1-1)	Inhibited TNF-α and IL-6 production	RAW 264.7	LPS (1 μg/mL)	20-40					<1500 pg/mL		<50 pg/mL								https://doi.org/10.1038/srep40228
	Synthetic		De novo designed	Chemical synthesis	LKWLKKLLKKL (WALK11.3)	Inhibited NO, COX-2, IL-1β, IL-6, INF-β, and TNF-α expression	RAW 264.7	LPS (100 ng/mL)	2.82					<2 pg/mL		0 pg/mL								https://doi.org/10.1371/journal.pone.0126871
	Synthetic		Hybrid (Cathelicidin-2 and thymopentin)	Chemical synthesis	RWGRFLRKIRRFRRKDVY (CTP)	Reduced TNF-α, IL-1β, and IL-6 production	RAW 264.7	LPS (100 ng/mL)	10					<200 pg/mL	<200 pg/mL	110 pg/mL								https://doi.org/10.3389/fimmu.2020.618312
	Synthetic		Hormone (Glucagon-like peptide-1)	Chemical synthesis	HAEGTFTSDVSSYLEGQAAKEFI (Liraglutide)	Reduced NO, PGE2, and IL-6 production, IL-6, COX-2, and TNF-α gene expression	RAW 264.7	IL-1β (2 ng/mL) LPS 100 (ng/mL)	0.101992							50 pg/mL								https://doi.org/10.1038/s41598-022-05323-7
	Synthetic		De novo designed	Chemical synthesis	KKIRVRLSA (SET-M33D)	Reduced TNF-α, IL6, COX-2, iNOS and NF-κB gene expression	RAW 264.7	LPS (20-1000 ng/mL)	13.91							50 pg/mL								http://dx.doi.org/10.3390/antibiotics9120840
	Synthetic		AMP (Pseudin-2)	Chemical synthesis	GLNALKKVFQGIHEAIKKINNHVQ ( Ps-K18)	Inhibited NF-κB gene expression and TNF-α, IL-6 and IL-1α production	RAW 264.7	LPS (20 ng/mL)	54.003					−49% mTNF-α	−88 mIL-1	−87% mIL-6								https://doi.org/10.3390/ijms20194895
	Synthetic		Hormone (Protease-activated receptor-3)	Chemical synthesis	GAPPNSFEEFPFSALEGWTGATIT	Reduced IL-1β production	THP-1	LPS (1000 ng/mL)	126335						<40 pg/mL									https://doi.org/10.1111/jth.15133
	Synthetic		Hormone (Protease-activated receptor-1)	Chemical synthesis	NPNDKYEPFWEDEEKNESGL	Reduced IL-1β production	THP-1	LPS (1000 ng/mL)	122024						50 pg/mL									https://doi.org/10.1111/jth.15133
	Synthetic		Hybrid (Bovine lactoferrin and human cathelicidin)	Chemical synthesis	RLWKKILKVIRKPRWQWRR (Lf-KR)	Inhibited NO and TNF-α expression and production	RAW 264.7	LPS (200 ng/mL)	10589					1000 pg/mL										https://doi.org/10.1038/s41598-022-08247-4
	Synthetic		De novo designed	Chemical synthesis	KKIRVRLSA (SET-M33D)	Reduced TNF-α, IL6, COX-2, iNOS and NF-κB gene expression	RAW 264.7	LPS (20-1000 ng/mL)	14.56					50 pg/mL										http://dx.doi.org/10.3390/antibiotics9120840
	Synthetic		Hormone (Parathyroid hormone–related protein)	Chemical synthesis	ETNKV	Reduced IL-6 and PGE2 production	HOb-OA	IL-1β (10ng/mL)	0.003897									<1000 pg/mg protein						https://doi.org/10.1093/gerona/glw100
	Synthetic		Hormone (Parathyroid hormone–related protein)	Chemical synthesis	ETNKVETYKEQPLKTPGKKKKGKPGKRREQEKK	Reduced IL-6, PGE2, TNF-α production and NF-κB activation	HOb-OA	IL-1β (10ng/mL)	0.000589									<1000 pg/mg protein						https://doi.org/10.1093/gerona/glw100
	Synthetic		Hormone (Glucagon-like peptide-1)	Chemical synthesis	HAEGTFTSDVSSYLEGQAAKEFI (Liraglutide)	Reduced NO, PGE2, and IL-6 production, IL-6, COX-2, and TNF-α gene expression	RAW 264.7	IL-1β (2 ng/mL) LPS 100 (ng/mL)	0.134332									50 pg/mL						https://doi.org/10.1038/s41598-022-05323-7
					125 péptidos
